# Supplementary material
Source: MDPI journal article supplement (https://www.mdpi.com/2073-4344/11/6/746)
Supplement: s1 [file s1 › catalysts-1257761-supplementary.pdf]

# Supporting Information

## Selective Catalytic Oxidation of Lean-H<sub>2</sub>S Gas Stream to Elemental Sulfur at Lower Temperature

Daniela Barba \*, Vincenzo Vaiano and Vincenzo Palma

Department of Industrial Engineering, University of Salerno, Via Giovanni Paolo II, 132,  
84084 Fisciano, Italy

\* dbarba@unisa.it (D. Barba)

### Figure S1

For the catalyst with the lowest V-content, the shift of this Raman signal could be due to the interaction of the CeO<sub>2</sub> with the sulfur while, for the sample with the highest V-content, the shifting phenomenon could be due to the interaction of the support with the incipient formation of the vanadium sulfide [1-2]. For the sample with the highest vanadium content (50 wt%), it is possible to see an intense Raman band at 138 cm<sup>-1</sup> that can be ascribed to the incipient transformation of the bulk V<sub>2</sub>O<sub>5</sub> into VS<sub>2</sub> [2]. This hypothesis will be successively clarified considering also the results of the characterizations performed on the catalysts after the catalytic activity tests. This Raman band, which is rather broad, is only visible for the bulk V<sub>2</sub>O<sub>5</sub> after the sulfuration.

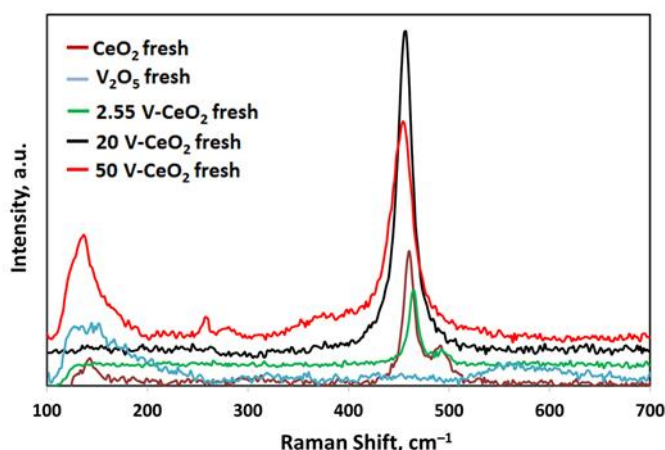

**Figure S1.** Raman spectra of CeO<sub>2</sub>, V<sub>2</sub>O<sub>5</sub> and 2.55, 20, 50 V-CeO<sub>2</sub> fresh catalysts.

## Figure S2

Generally, this shift could be due to the increased number of oxygen vacancies of the cerium oxide after the impregnation with V-species and it could depend on the V-metal loading. The Raman mode at  $460\text{ cm}^{-1}$  corresponding to symmetric  $\text{Ce-O}_8$  vibrations, must be extremely sensitive to any disturbance in the symmetry of the oxygen sublattice, including changes in the oxygen stoichiometry of cerium dioxide caused by thermal treatment and/or dimensional defects [3]. A very dissimilar result was obtained for the 2.55 V- $\text{CeO}_2$  used catalyst. Indeed, for this sample, it is possible to observe Raman signals at 148, 216, 434 and  $468\text{ cm}^{-1}$  ascribable to the sulfur whereas the band of  $\text{CeO}_2$  is noticeable at  $465\text{ cm}^{-1}$  (Figure S2 b) [1]. The signal at  $216\text{ cm}^{-1}$  with a low intense band at  $148\text{ cm}^{-1}$  could be attributed to S-S-S bending vibration, while the band at  $468\text{ cm}^{-1}$  could be related to S-S stretching of polymeric sulfur species adsorbed at the multilayer level [4]. For the used 20 V- $\text{CeO}_2$ , Raman bands related to the sulfur at 148, 216, 243, 433, and  $470\text{ cm}^{-1}$  are present [1]. The Raman spectra of the catalyst with the highest vanadium loading (Figure S2 d) are very different, where an additional Raman band at  $138\text{ cm}^{-1}$  is observable, typical of vanadium sulfide in  $\text{VS}_2$  form [2]. These results suggest that the sulfur deposition on the catalyst surface is favoured in samples at lower V-loading (2.55 V- $\text{CeO}_2$  and 20 V- $\text{CeO}_2$ ), while it is not observable in catalysts having high V-loading (50 V- $\text{CeO}_2$ ). The coverage of the support by the sulfur produced during the reaction is evidenced by the absence of the  $\text{CeO}_2$  peaks on the 2.55 and 20 V- $\text{CeO}_2$  used catalysts. However, the disappearance of the  $\text{CeO}_2$  Raman band on the 50 V- $\text{CeO}_2$  used sample is likely due to the further  $\text{VS}_2$  segregation during the reaction that could have determined the coverage of the support.

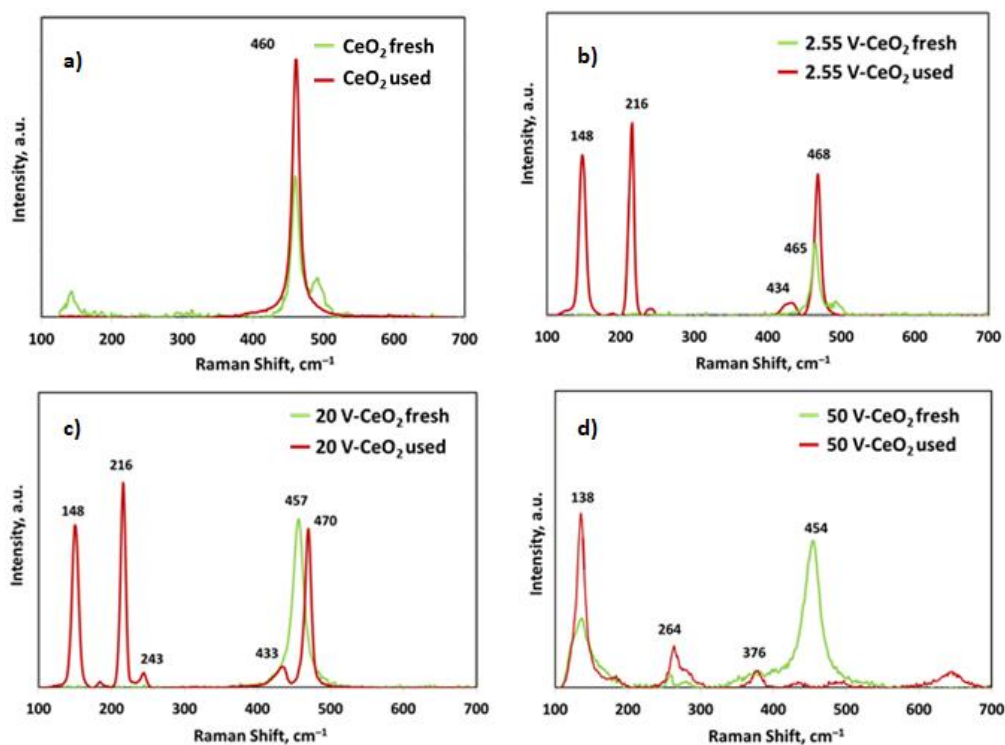

**Figure S2.** Raman spectra of fresh and used catalysts  $\text{CeO}_2$  (a), 2.55 V- $\text{CeO}_2$  (b), 20 V- $\text{CeO}_2$  (c), 50 V- $\text{CeO}_2$  (d).

## References

1. Ward, A.T. Raman spectroscopy of sulfur, sulfur-selenium, and sulfur-arsenic mixtures. *J Phys Chem* **1968**, 72, 4133–4138, doi:10.1021/j100858a031.
2. Huang, L.; Zhu, W.; Zhang, W.; Chen, K.; Wang, J.; Wang, R.; Yang, Q.; Hu, N.; Suo, Y.; Wang, J. Layered vanadium (IV) disulfide nanosheets as a peroxidase-like nanozyme for colorimetric detection of glucose. *Microchim. Acta* **2018**, 185, doi:10.1007/s00604-017-2552-1.
3. Kainbayev, N.; Sriubas, M.; Virbukas, D.; Rutkuniene, Z.; Bockute, K.; Bolegenova, S.; Laukaitis, G. Raman Study of Nanocrystalline-Doped Ceria Oxide Thin Films. *Coatings* **2020**, 10, 432, doi:10.3390/coatings10050432.
4. Harvey, P.D.; Butler, Ian S. Raman Spectra of Orthorhombic Sulfur at 40 K. *J. Raman Spectrosc* **1986**, 17, 329–334, doi:0.1002/jrs.1250170407.
